# Supplementary material for: A landscape of genetic heterogeneity in germline predisposition to familial chronic lymphocytic leukemia
Source: Research Square preprint supplement (doi:10.21203/rs.3.rs-7313089/v1), 2025-09-01
Supplement: Supplementary file 1 [file 0d898160d5a8585b12e5f96b.docx]

|  | **pathogenic**  **variants** | **recurrently mutated**  **genes** | **IMD**  **Genes** | **shelterin**  **complex** |  | **pathogenic**  **variants** | **recurrently mutated**  **genes** |  | **pathogenic**  **variants** | **recurrently mutated**  **genes** | **IMD**  **genes** | **shelterin**  **complex** |
| --- | --- | --- | --- | --- | --- | --- | --- | --- | --- | --- | --- | --- |
| **PED1** |  | ***CARD11; LRBA*** |  |  | **PED28** |  | ***ITGB2*** | **PED55** |  | ***ITGB4;ITGB2*** |  |  |
| **PED2** | ***RASA2*** |  |  |  | **PED29** |  | ***AFF1*** | **PED56** |  |  |  |  |
| **PED3** |  | ***PRRC2A;RTEL1;MDC1; CD82*** | ***PRF1*** |  | **PED30** |  | ***CD82*** | **PED57** |  | ***PRRC2A; DOCK8; CD302; LRBA;MMP9*** |  |  |
| **PED4** |  |  |  |  | **PED31** | ***CHEK2; RAD50*** | ***CYP2C19*** | **PED58** |  |  |  |  |
| **PED5** |  | ***MDC1*** |  |  | **PED32** |  |  | **PED59** | ***TINF2*** |  |  |  |
| **PED6** |  | ***DOCK8*** |  |  | **PED33** |  | ***RTEL1*** | **PED60** |  | ***DOCK8;ITGB2;LRBA*** | ***UNC13D*** |  |
| **PED7** |  | ***RTEL1*** |  |  | **PED34** | ***RUNX1*** | ***ITGB4*** | **PED61** | ***RUNX1*** |  |  |  |
| **PED8** | ***RAD50*** | ***PRRC2A; ITGB2; CD302*** |  |  | **PED35** | ***TNFRSF13B*** | ***ITGB4*** | **PED62** |  |  |  | ***TEP1*** |
| **PED9** |  | ***DMBT1*** |  |  | **PED36** |  |  | **PED63** |  | ***ITGB4;DOCK8*** | ***UNC13D*** |  |
| **PED10** |  |  |  |  | **PED37** | ***PRF1*** | ***CARD11*** | **PED64** | ***PRF1*** | ***PRRC2A*** | ***PRF1*** |  |
| **PED11** |  | ***DMBT1*** |  |  | **PED38** |  | ***ITGB4*** | **PED65** | ***TNFRSF13B*** |  |  |  |
| **PED12** |  |  |  |  | **PED39** | ***UNC13D*** | ***ITGB2; CYP2C19*** | **PED66** | ***CHEK2*** | ***RREB1*** |  | ***TEP1*** |
| **PED13** |  | ***RTEL1; MDC1*** |  |  | **PED40** |  | ***CD302*** | **PED67** | ***ERCC2*** | ***NCOR2; RREB1;AFF1*** |  | ***TEP1*** |
| **PED14** |  |  |  |  | **PED41** |  |  | **PED68** |  |  |  |  |
| **PED15** |  |  |  | ***TEP1*** | **PED42** |  |  | **PED69** |  | ***NCOR2;PRRC2A*** |  |  |
| **PED16** |  |  |  |  | **PED43** |  | ***DMBT1;MMP9;CD82; AFF1*** | **PED70** | ***MRE11*** |  |  |  |
| **PED17** |  | ***RREB1*** |  | ***TEP1*** | **PED44** |  | ***CD302; CYP2C19*** | **PED71** |  |  |  |  |
| **PED18** |  | ***NCOR2*** |  |  | **PED45** | ***TNFRSF13B*** | ***MDC1;DMBT1; MMP9;CD82*** | **PED72** |  |  |  |  |
| **PED19** |  |  |  | ***TERF1*** | **PED46** |  |  | **PED73** | ***CDKN1B*** | ***PRRC2A; RREB1*** |  |  |
| **PED20** |  | ***NCOR2*** |  |  | **PED47** |  | ***NCOR2; MDC1*** | **PED74** |  |  |  |  |
| **PED21** |  | ***NCOR2; ITGB4*** |  |  | **PED48** |  |  | **PED75** |  | ***DOCK8;CD302*** |  |  |
| **PED22** |  | ***CARD11*** |  |  | **PED49** |  |  | **PED76** |  |  |  |  |
| **PED23** |  | ***RREB1;CARD11*** |  |  | **PED50** |  |  | **PED77** | ***CHEK2*** |  |  |  |
| **PED24** |  | ***PRRC2A;LRBA*** |  |  | **PED51** |  | ***MMP9;AFF1*** | **PED78** |  | ***DOCK8*** |  | ***POT1*** |
| **PED25** | ***TNFRSF13B*** |  | ***PRF1*** |  | **PED52** | ***RASA2*** | ***CARD11*** | **PED79** |  |  |  |  |
| **PED26** | ***RAD51D*** | ***CYP2C19*** |  | ***TERF2*** | **PED53** |  |  | **PED80** |  |  |  |  |
| **PED27** |  | ***RTEL1*** |  |  | **PED54** | ***POT1*** |  | **PED81** |  |  |  |  |

Supplementary Table 4. Final description of genes found mutated in different families. In the first column next to each pedigree are present genes whose variant is pathogenic, and could be considered causative of the disease. In the next columns, recurrently mutated genes, genes involved in immunodeficiency (IMD) and genes of the shelterin complex
