# Supplementary material for: A landscape of genetic heterogeneity in germline predisposition to familial chronic lymphocytic leukemia
Source: Research Square preprint supplement (doi:10.21203/rs.3.rs-7313089/v1), 2025-09-01
Supplement: Supplementary file 2 [file 972b24121de9caccb7f358c0.docx]

| **Pedigree** | **gene** | **variant** | **CADD** | **REVEL** | **gnomAD** | **ClinVar** | **VarElect** |
| --- | --- | --- | --- | --- | --- | --- | --- |
| **29** | *ATM* | c.445A>T:p.I149F | 23.9 | 0.378 | . | . | 170 |
| **34** | *ATM* | c.1960C>A:p.Q654K | 18.9 | 0.126 | 34/1613870 | 11VUS 2LB | 170 |
| **45** | *ATM* | c.4431C>G:p.N1477K | 20.5 | 0.159 | 1/1612032 | 5VUS* | 170 |
| **44** | *ATM* | c.4709T>C:p.V1570A | 17.7 | 0.152 | 631/1612060 | 12VUS 19LB/B | 170 |
| **70** | *ATM* | c.5975A>C:p.K1992T | 21.7 | 0.256 | 344/1590620 | 11VUS 17LB/B | 170 |
| **34** | *ATM* | c.6293T>C:p.L2098P | 25 | 0.74 | 11/1461370 | 8VUS | 170 |
| **20*** | *ATM* | c.1703G>T:p.R568I | 18.0 | 0.111 | 197/1613762 | 9VUS 10LB/B | 170 |
| **21*** | *ATM* | c.4060C>A:p.P1354T | 18.1 | 0.08 | 296/1613640 | 10VUS 9LB/B | 170 |
| **4*** | *ATM* | c.C5456C>T:p.T1819I | 9.43 | 0.124 | 3/1613336 | 4VUS 1LB | 170 |

Supplementary Table 3. Description of variants in ATM. CADD and REVEL scores are considered significant above 20 and 0.7 respectively. In ClinVar column are indicated, if present, the number of submissions and their evaluation P stands for Pathogenic, VUS for variant of undetermined significance. CGI Cancer Genome Interpreter
