# Supplementary material for: A landscape of genetic heterogeneity in germline predisposition to familial chronic lymphocytic leukemia
Source: Research Square preprint supplement (doi:10.21203/rs.3.rs-7313089/v1), 2025-09-01
Supplement: Supplementary file 3 [file d03d3c370adf998b865f7178.docx]

| **Pedigree** | **Gene** | **Variant** | **CADD** | **REVEL** | **gnomAD** | **ClinVar** |
| --- | --- | --- | --- | --- | --- | --- |
| **40** | *SDHA* | c.1055G>A:p.R352Q | 31 | 0.477 | 264/1613846 | 9VUS 2B |
| **5** | *SDHA* | c.1393C>T:p.R465W | 24.2 | 0.455 | 12/1613892 | 3VUS |
| **10** | *SDHB* | c.344G>T:p.R115L | 20.9 | 0.443 | 9/1614100 | 1VUS |
| **65** | *SDHB* | c.299C>G:p.S100C | 29.4 | 0.92 | 15/1614044 | 6VUS |
| **69** | *SDHC* | c.98C>T:p.T33M | 25.7 | 0.558 | 172/1612914 | 10VUS |
| **71** | *MUTYH* | c.1211C>T:p.P404L | 0.35 | 19.7 | 2/1614130 | 2VUS |
| **34** | *MUTYH* | c.1199C>T:p.A400V | 0.189 | 16.1 | 3/1614056 | 5VUS |
| **42** | *MUTYH* | c.184G>A:p.V62I | 0.0500 | 0.001 | 36/1614110 | 4VUS 1LB |
| **62** | *FH* | c.98T>G:p.V33G | 5.8 | 0.374 | 3/1547774 | 3VUS 1LB |
| **36** | *ALK* | c.3692G>A:p.R1231Q | 21.4 | 0.347 | 169/1613992 | 2VUS 2LB |
| **72** | *ALK* | c.2527G>A:p.G843R | 25.8 | 0.537 | 21/1614148 | 1VUS |
| **29** | *PMS2* | c.2383G>A:p.G795R | 26.8 | 0.725 | 3/1604060 | 3VUS |
| **70** | *PMS2* | c.212A>G:p.N71S | 25.5 | 0.85 | 2/1606004 | 7VUS |
| **5** | *MSH2* | c.199A>G:p.M67V | 25.2 | . | 12/1594238 | 1VUS 1 LB |
| **57** | *MSH6* | c.3100C>T:p.R1034W | 25.3 | 0.834 | 22/1610222 | 10VUS 1LB |
| **64** | *BARD1* | c.1028C>T:p.T343I | 14.1 | 0.0830 | 200/1614100 | 8VUS 4LB |
| **80** | *BRCA2* | c.3723T>G:p.F1241L | 18.45 | 0.521 | . | 6VUS 1LB |
| **54** | *ATR* | c.6467T>C:p.V2156A | 21.54 | 0.404 | . | . |
| **49** | *ATR* | c.1379G>A:p.S460N | 18.75 | 0.109 | 2/1613016 | 1VUS |
| **52** | *ATR* | c.1006C>T:p.R336W | 21.6 | 0.292 | 41/1613984 | 6VUS |
| **65** | *KIT* | c.200C>G:p.T67S | 19.6 | 0.0600 | 3/1614102 | 1VUS |
| **76** | *KIT* | c.952A>G:p.M318V | 1.68 | 0.295 | 253/1559830 | 6VUS 2LB |
| **68** | *VHL* | c.98C>A:p.S33X | 32.0 | . | 1/1542036 | 3VUS |
| **78** | *VHL* | c.343C>T:p.L115F | 6.867 | . | . | . |
| **43** | *TNFAIP3* | c.1093A>G:p.R365G | 16.02 | 0.028 | . | . |
| **79** | *TNFAIP3* | c.2206T>C:p.C736R | 25.7 | 0.853 | 1/1613264 | . |
| **68** | *SAMD9* | c.1042A>G:p.S348G | 17.9 | 0.08 | 15/1613900 | 1VUS |
| **36** | *SMO* | c.1769G>C:p.S590T | 24.8 | 0.742 | 70/1613294 | . |
| **26** | *BRAF* | c.1496A>G:p.K499R | 22.8 | 0.42 | 1/1613462 | . |
| **47** | *NBN* | c.1315A>G:p.I439V | 0.31 | 0.003 | 22/1613796 | 3VUS 2LB |
| **38** | *PTCH1* | c.2074G>A:p.V692M | 15.1 | 0.175 | 58/1613916 | 1VUS 2B/LB |
| **4** | *PTCH1* | c.113G>T:p.G38V | 13.5 | 0.215 | 539/1603018 | 1VUS 9B/LB |
| **64** | *TSC1* | c.532G>A:p.V178I | 20.9 | 0.365 | 266/1613958 | 3VUS 8B/LB |
| **63** | *RET* | c.890G>A:p.R297H | 8.03 | 0.106 | 16/1612216 | 3VUS 1LB |
| **78** | *RET* | c.1597G>A:p.G533S | 26.5 | 0.897 | 56/1574978 | 13VUS 2LB |
| **20** | *CHUK* | c.815T>C:p.M272T | 23.1 | 0.353 | . | . |
| **64** | *WT1* | c.163G>T:p.G55C | 14.85 | 0.04 | . | . |
| **46** | *WT1* | c.147C>G:p.S49R | 14.3 | 0.043 | 38/1530824 | 7VUS |
| **26** | *CBL* | c.1039C>A:p.P347T | 29.2 | 0.821 | . | 1VUS |
| **40** | *CBL* | c.2262T>G:p.N754K | 8.68 | 0.127 | 93/1613996 | 2VUS 2LB |
| **47** | *POLE* | c.3890C>T:p.S1297L | 3.99 | 0.068 | 43/1612948 | 6VUS |
| **51** | *POLE* | c.3857G>A:p.R1286H | 28.9 | 0.481 | 122/1612126 | 7VUS |
| **1** | *RB1* | c.1325G>C:p.G442A | 24.5 | 0.768 | 2/1613552 | 3VUS |
| **73** | *RB1* | c.1598A>T:p.E533V | 29.4 | 0.972 | . | . |
| **46** | *STK11* | c.1211C>T:p.S404F | 18.4 | 0.632 | 1241/1599480 | 6VUS 17B/LB |
| **61** | *SMARCA4* | c.679G>A:p.A227T | 12.4 | 0.182 | 18/1545208 | 2VUS 1LB |
| **53** | *SMARCA4* | c.691_702del:p.G241_P244del | 19.9 | 0.252 | 6/1541028 | 2LB |
| **71** | *SMARCA4* | c.4285C>T:p.R1429C | 29.3 | 0.443 | 6/1612362 | 2VUS 1LB |

Supplementary Table 2. Description of variants in tumor suppressor genes. CADD and REVEL scores are considered significant above 20 and 0.7 respectively. In ClinVar column are indicated, if present, the number of submissions and their evaluation P stands for Pathogenic, VUS for variant of undetermined significance. CGI Cancer Genome Interpreter.
