# Supplementary material for: A landscape of genetic heterogeneity in germline predisposition to familial chronic lymphocytic leukemia
Source: Research Square preprint supplement (doi:10.21203/rs.3.rs-7313089/v1), 2025-09-01
Supplement: Supplementary file 4 [file ddef417fb74620ffba4af0cc.docx]

|  | **FAMILIES** | **VarElect** |
| --- | --- | --- |
| **NCOR2** | 9 | 7 |
| **PRRC2A** | 7 | 4 |
| **ITGB4** | 6 | 7 |
| **DOCK8** | 6 | 89 |
| **ITGB2** | 5 | 52 |
| **RREB1** | 5 | 7 |
| **RTEL1** | 5 | 35 |
| **MDC1** | 5 | 16 |
| **CARD11** | 5 | 125 |
| **LY75;LY75-CD302** | 5 | 6 |
| **DMBT1** | 4 | 8 |
| **MMP9** | 4 | 38 |
| **CYP2C19** | 4 | 11 |
| **CD82** | 4 | 7 |
| **LRBA** | 4 | 148 |
| **AFF1** | 4 | 12 |

Supplementary Table 1. Genes with recurrent variants in different families, in the VarElect column was indicated the score of each gene
